# Supplementary material
Source: PubMed Central journal article supplement (PMC5154549)
Supplement: NIHMS827357-supplement-1.pdf [file NIHMS827357-supplement-1.pdf]

## Supplemental materials

Figure S1a Pathway network analysis of the top 100 genes regulated by Klotho in MO3.13 cells

Figure S1b Pathway network analysis of the top 100 genes genes regulated by Klotho in MO3.13 cells

Table S1: qPCR confirmation of the 91 regulated genes using RNA from cultured MO3.13 cells treated with Klotho for 1, 2.5 and 3.5 hrs.

Table S2: Signal Transduction Pathway Reporters.

Table S3. Up-regulated genes of Klotho treated MO3.3 cells vs. CGP database

Table S4. Down-regulated genes of Klotho treated MO3.3 cells vs. CGP database



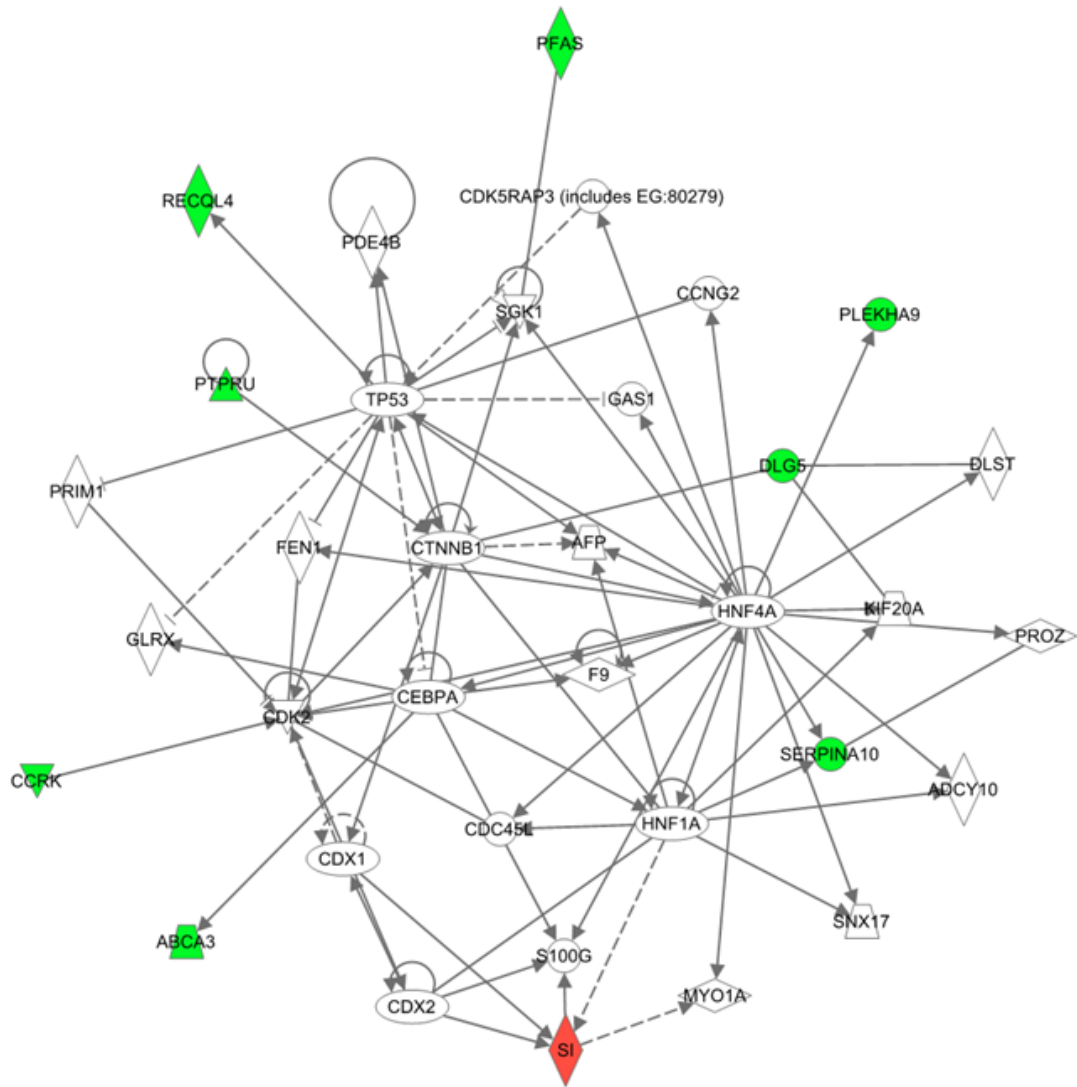

Figure S1b

Table S1: qPCR confirmation of the 91 regulated genes using RNA from cultured MO3.13 cells treated with Klotho for 1, 2.5 and 3 hrs.

|                                 | Symbol                            | Accession    | 1 hr               |                     | 2.5 hr             |                     | 3.5 hr              |                     |
|---------------------------------|-----------------------------------|--------------|--------------------|---------------------|--------------------|---------------------|---------------------|---------------------|
|                                 |                                   |              | T-TEST p           | Fold change         | T-TEST p value     | Fold change         | T-TEST p            | Fold change         |
| Upregulated genes in microarray | EFNA1                             | NM_004428    | 0.161265172        | <b>59.10500237</b>  | 0.120140584        | <b>3.285812142</b>  | 0.066557075         | <b>-6.744680017</b> |
|                                 | <b>SLC5A8</b>                     | NM_145913    | 0.058682932        | <b>125243.3953</b>  | <b>0.037845128</b> | <b>3.832547513</b>  | 0.903803812         | <b>1.17249627</b>   |
|                                 | TGIF2LX                           | NM_138960    | <b>0.048905691</b> | <b>7010.046668</b>  | 0.650856242        | <b>23.02246403</b>  | <b>0.009382928</b>  | <b>11770.734</b>    |
|                                 | <b>GRAP2</b>                      | NM_004810    | <b>0.000308192</b> | <b>3.645836843</b>  | 0.168020537        | <b>3.645836843</b>  | 0.412034139         | <b>-2.922257548</b> |
|                                 | CCDC68                            | NM_025214    | <b>0.016717437</b> | <b>68.56379217</b>  | 0.264388058        | <b>2.408135659</b>  | 0.69509389          | <b>3.449171824</b>  |
|                                 | KLHL34                            | NM_153270    | 0.136752737        | <b>64.3057126</b>   | <b>0.011906026</b> | <b>3.308666772</b>  | 0.649535219         | <b>4.290809944</b>  |
|                                 | MAOA                              | NM_000240    | 0.854426924        | <b>1.155519548</b>  | 0.59091956         | <b>1.367224353</b>  | 0.4852378           | <b>9.621421112</b>  |
|                                 | LGR6                              | NM_001017403 | <b>0.02086637</b>  | <b>216430.1055</b>  | 0.233625846        | <b>28.01841962</b>  | 0.250623278         | <b>-4.580219271</b> |
|                                 | GRIA3                             | NM_007325    | <b>0.041391395</b> | <b>7565.440303</b>  | <b>0.022064942</b> | <b>4.187966784</b>  | 0.099600274         | <b>-5.658488249</b> |
|                                 | <b>TFCP2L1</b>                    | NM_014553    | <b>0.03788333</b>  | <b>2.693300118</b>  | 0.457965401        | <b>1.706747927</b>  | 0.680885323         | <b>3.916549883</b>  |
|                                 | DKFzP451A211                      | BX647655     | 0.481440261        | <b>-11.27293805</b> | 0.149731692        | <b>-39.91198148</b> | 0.063332655         | <b>-348.1945955</b> |
|                                 | SERPINA10                         | NM_016186    | 0.847621387        | <b>-1.33464711</b>  | 0.21522808         | <b>2.259886004</b>  | 0.050130694         | <b>-9.772651195</b> |
|                                 | MGAM                              | NM_004668    | 0.191380288        | <b>26.38918701</b>  | 0.160939215        | <b>-85.25721358</b> | 0.504860167         | <b>-27.54560032</b> |
|                                 | IL28A                             | NM_172138    | 0.551332298        | <b>-2.022219593</b> | 0.178558388        | <b>-1.739909902</b> | <b>0.013850091</b>  | <b>-21.06948774</b> |
|                                 | <b>GPR112</b>                     | NM_153834    | 0.661096047        | <b>69362.82321</b>  | <b>0.021583644</b> | <b>14.8079875</b>   | 0.398177848         | <b>42.80131846</b>  |
|                                 | CHRFAM7A                          | NM_139320    | 0.280662103        | <b>12.31099105</b>  | 0.982474495        | <b>1.018361653</b>  | 0.071233849         | <b>-9.213504422</b> |
|                                 | KRT14                             | NM_000526    | 0.457221637        | <b>3.088432928</b>  | 0.710552035        | <b>1.162038725</b>  | 0.611528688         | <b>23.96599058</b>  |
|                                 | NRXN3                             | NM_004796    | 0.072158492        | <b>33461.357</b>    | 0.095986602        | <b>178.6819383</b>  | 0.831281944         | <b>-2.040255738</b> |
|                                 | DCN                               | NM_001920    | 0.198235271        | <b>687.0993938</b>  | 0.280765163        | <b>-1.587502785</b> | 0.267514773         | <b>-3.87380142</b>  |
|                                 | Downregulated genes in microarray | <b>HSPG2</b> | NM_005529          | 0.554416856         | <b>1.624739397</b> | <b>0.026173244</b>  | <b>-2.004294625</b> | 0.512144638         |
| C10orf125                       |                                   | NM_198472    | 0.351367867        | <b>2.153786133</b>  | 0.980456404        | <b>1.007804236</b>  | 0.204814309         | <b>138.5807763</b>  |
| PKHD1L1                         |                                   | NM_177531    | 0.078761264        | <b>41915.85198</b>  | 0.285975298        | <b>-2.392241417</b> | 0.510812122         | <b>18.37386633</b>  |
| GIMAP6                          |                                   | NM_024711    | <b>0.018566545</b> | <b>155.0806632</b>  | 0.724134093        | <b>-2.005205366</b> | 0.482628728         | <b>-13.07509932</b> |
| ACSM2B                          |                                   | NM_182617    | 0.379755745        | <b>-27.24887948</b> | 0.229180716        | <b>-261.7568231</b> | 0.232487448         | <b>-399.5087617</b> |
| WDR63                           |                                   | NM_145172    | 0.276861743        | <b>2.515842603</b>  | 0.425622731        | <b>-1.782312114</b> | 0.17397345          | <b>-7.623305363</b> |
| <b>IGF2</b>                     |                                   | NM_000612    | 0.154427173        | <b>-91.97213973</b> | <b>0.026436015</b> | <b>-3.292107419</b> | <b>0.000929036</b>  | <b>-21.5370687</b>  |
| MYO18B                          |                                   | NM_032608    | 0.405047949        | <b>4.253179274</b>  | <b>0.000692931</b> | <b>6.850693308</b>  | <b>0.013211593</b>  | <b>-7.623305363</b> |
| <b>DCTN1</b>                    |                                   | NM_004082    | 0.050887813        | <b>-11.06648383</b> | <b>0.049498314</b> | <b>-2.918494287</b> | <b>0.000364798</b>  | <b>-36.93926699</b> |
| RPL35                           |                                   | NM_007209    | 0.984561327        | <b>-1.090350269</b> | 0.853566585        | <b>-1.134353562</b> | 0.408621181         | <b>-2.423485303</b> |
| <b>CENTG1</b>                   |                                   | NM_014770    | 0.822063138        | <b>-1.806409527</b> | <b>0.024528155</b> | <b>-2.461625547</b> | <b>0.036142694</b>  | <b>-132.3991454</b> |
| MNS1                            |                                   | NM_018365    | <b>0.046662955</b> | <b>2.901652996</b>  | 0.080234408        | <b>-2.25023032</b>  | <b>0.040416703</b>  | <b>-5.261290342</b> |
| USP9Y                           |                                   | NM_004654    | 0.434089666        | <b>2.945559441</b>  | 0.857831631        | <b>-1.089582943</b> | 0.496263637         | <b>12.87276442</b>  |
| NID2                            |                                   | NM_007361    | 0.247068629        | <b>2.085232619</b>  | 0.839561969        | <b>1.176193902</b>  | <b>0.008247724</b>  | <b>-3.81605862</b>  |
| GLI3                            |                                   | NM_000168    | 0.974710259        | <b>1.017626633</b>  | 0.977270247        | <b>-1.014119988</b> | <b>0.021284751</b>  | <b>-5.658488249</b> |
| LOC151534                       |                                   | AK125271     | 0.46479509         | <b>1.674280984</b>  | 0.457636988        | <b>-1.391636975</b> | <b>0.041709327</b>  | <b>-4.454972934</b> |
| C9orf25                         |                                   | NM_147202    | 0.211793166        | <b>406.4333563</b>  | 0.480518823        | <b>-1.290252859</b> | 0.083465842         | <b>-2.290109635</b> |
| CBWD5                           |                                   | NM_001024916 | 0.525389188        | <b>-6.772984371</b> | 0.069779499        | <b>-2.521833282</b> | 0.081799304         | <b>-6.477408211</b> |
| UNC13B                          |                                   | NM_006377    | 0.066892608        | <b>4.464633242</b>  | 0.455327421        | <b>3.997060569</b>  | <b>0.007006012</b>  | <b>-8.419590107</b> |
| TCTN2                           |                                   | NM_024809    | 0.187518586        | <b>17.37019045</b>  | 0.181876754        | <b>-1.938003094</b> | 0.084603571         | <b>-4.725335179</b> |
| PPIG                            |                                   | NM_004792    | 0.446975706        | <b>159.0726134</b>  | 0.394148292        | <b>-1.89779674</b>  | 0.255160805         | <b>-49.02401255</b> |
| DLG5                            |                                   | NM_004747    | 0.143842361        | <b>-627.3492433</b> | 0.198902335        | <b>-226.5601005</b> | 0.100216213         | <b>-2065.225116</b> |
| <b>LRP1</b>                     |                                   | NM_002332    | 0.803040683        | <b>1.331951607</b>  | <b>0.014278106</b> | <b>-1.634029413</b> | 0.3017484           | <b>-22.60782033</b> |
| <b>ZFH3</b>                     |                                   | NM_006885    | 0.099063823        | <b>-383.954532</b>  | <b>0.04303407</b>  | <b>-1.724667361</b> | 0.07303407          | <b>-4717.314264</b> |
| AFAP1                           |                                   | NM_198595    | 0.084297753        | <b>3.010928259</b>  | 0.119272069        | <b>-2.15317848</b>  | 0.622013418         | <b>2.635207684</b>  |
| <b>PFAS</b>                     |                                   | NM_012393    | 0.092480741        | <b>-308.2858794</b> | <b>0.018420638</b> | <b>-2.891400474</b> | 0.135394378         | <b>-1102.897753</b> |
| POLR2A                          |                                   | NM_000937    | 0.401410104        | <b>3.630600863</b>  | 0.27314673         | <b>-1.330672444</b> | <b>0.015404594</b>  | <b>-7.321216223</b> |
| PPP2R1A                         |                                   | NM_014225    | <b>0.011088177</b> | <b>3.306278684</b>  | 0.391087582        | <b>-1.933654928</b> | 0.57904073          | <b>9.688343388</b>  |
| FASN                            |                                   | NM_004104    | 0.160737298        | <b>192.0327192</b>  | 0.305797886        | <b>-1.647102934</b> | <b>0.032996448</b>  | <b>-10.51043154</b> |
| TNS1                            |                                   | NM_022648    | 0.309044145        | <b>2.921835588</b>  | 0.417079553        | <b>-1.368201955</b> | <b>0.00583758</b>   | <b>-6.974468766</b> |
| HGFAC                           |                                   | NM_001528    | 0.113706852        | <b>10.74213113</b>  | 0.369845716        | <b>-2.063868573</b> | 0.141474084         | <b>-3.58941815</b>  |
| AMT                             |                                   | NM_000481    | 0.646220085        | <b>-1.931593705</b> | 0.273010681        | <b>-1.428810763</b> | 0.538852156         | <b>42.16332294</b>  |
| FZD5                            |                                   | NM_003468    | 0.080894736        | <b>-3.196422984</b> | <b>0.016745923</b> | <b>-1.559837057</b> | 0.168461781         | <b>479.2329628</b>  |
| PLEKHA9                         |                                   | NM_015899    | 0.206271033        | <b>-3.958055019</b> | 0.293024028        | <b>-1.308657589</b> | <b>0.008393467</b>  | <b>-7.245490368</b> |
| WIPF1                           |                                   | NM_003387    | 0.786542414        | <b>4.218923711</b>  | 0.26795869         | <b>-778.9660634</b> | 0.753833201         | <b>-13.72514989</b> |
| <b>DISC1</b>                    |                                   | NM_018662    | 0.331706315        | <b>22.37074918</b>  | <b>0.012553647</b> | <b>-1.698640399</b> | 0.144209896         | <b>-15.98614306</b> |
| GNAS                            |                                   | NM_001077490 | 0.970104107        | <b>-1.100473954</b> | 0.314189142        | <b>-12.36979769</b> | 0.084669003         | <b>-160.9441877</b> |
| PTPRU                           |                                   | NM_005704    | 0.729642764        | <b>-1.821076674</b> | 0.43682763         | <b>-1.157496094</b> | 0.243805011         | <b>-2.561667686</b> |
| DENND3                          |                                   | NM_014957    | 0.199436129        | <b>724.1819124</b>  | 0.983024767        | <b>1.011430706</b>  | <b>0.036397393</b>  | <b>-6.736892756</b> |
| <b>ABCA3</b>                    |                                   | NM_001089    | 0.430884828        | <b>-1.671864972</b> | <b>0.018736518</b> | <b>-1.862767058</b> | 0.06491135          | <b>-4.278435477</b> |
| ZBTB4                           |                                   | NM_020899    | 0.714701213        | <b>1.380516693</b>  | 0.744670647        | <b>-1.212100349</b> | <b>0.010659642</b>  | <b>-17.75823959</b> |
| <b>RECQL4</b>                   |                                   | NM_004260    | 0.699024193        | <b>-4.404439185</b> | <b>0.003368955</b> | <b>-2.119538247</b> | 0.231730261         | <b>-57.69669066</b> |
| LPXN                            |                                   | NM_004811    | <b>0.043187002</b> | <b>42.13289081</b>  | 0.248177719        | <b>-39.78547383</b> | <b>0.0271134</b>    | <b>-4.886325598</b> |
| C9orf58                         |                                   | NM_031426    | 0.55770638         | <b>-1.470654478</b> | 0.146677168        | <b>-1.732612076</b> | <b>0.011559539</b>  | <b>-11.35626619</b> |
| ZNF528                          |                                   | NM_032423    | 0.13481532         | <b>129.2071114</b>  | 0.203671997        | <b>-2.261946492</b> | <b>0.039867733</b>  | <b>-8.085946548</b> |
| UGDH                            |                                   | NM_003359    | <b>0.026786705</b> | <b>19.20675203</b>  | <b>0.004399933</b> | <b>-1.542719324</b> | 0.131601407         | <b>-60.49525154</b> |
| CCDC40                          |                                   | NM_017950    | 0.798168735        | <b>-1.591302744</b> | 0.344855013        | <b>-1.611938871</b> | <b>0.014196535</b>  | <b>-6.149276449</b> |
| MED25                           |                                   | NM_030973    | 0.293633209        | <b>48.73461695</b>  | <b>0.021544297</b> | <b>-1.521784116</b> | 0.988099931         | <b>1.036162301</b>  |
| SARM1                           |                                   | NM_015077    | <b>0.04781428</b>  | <b>2.861705081</b>  | 0.084253425        | <b>-2.101991917</b> | 0.952622821         | <b>1.195750726</b>  |
| NCLN                            |                                   | NM_020170    | 0.163503289        | <b>9.936297251</b>  | 0.377378868        | <b>1.198823975</b>  | <b>0.018184723</b>  | <b>-3.656381653</b> |
| <b>B4GALNT3</b>                 |                                   | NM_173593    | 0.294222132        | <b>155.7989464</b>  | <b>0.025438911</b> | <b>-2.82905817</b>  | <b>0.002763255</b>  | <b>-8.586578257</b> |
| ERBB3                           |                                   | NM_001982    | <b>0.007961409</b> | <b>5.959570386</b>  | 0.113013827        | <b>-2.037882284</b> | 0.744785431         | <b>3.980408963</b>  |
| ITSN2                           |                                   | NM_006277    | 0.145462795        | <b>365.4528987</b>  | 0.258121582        | <b>-28.36222005</b> | 0.518493882         | <b>10.51650436</b>  |
| SI                              |                                   | NM_001041    | 0.08991093         | <b>2668.614134</b>  | <b>0.031000563</b> | <b>4.844171694</b>  | 0.427179973         | <b>33.42641357</b>  |
| DOCK5                           |                                   | NM_024940    | 0.121871285        | <b>5.592687294</b>  | 0.739658698        | <b>-1.212865668</b> | 0.233295948         | <b>199.6390315</b>  |
| FLNB                            |                                   | NM_001457    | 0.336654714        | <b>1.674280984</b>  | 0.549972929        | <b>-1.416173634</b> | 0.156828162         | <b>-3.186744453</b> |
| <b>MAP3K5</b>                   |                                   | NM_005923    | 0.170903129        | <b>-114.4144136</b> | <b>0.024558563</b> | <b>-2.798796191</b> | 0.258920103         | <b>-324.1272862</b> |
| <b>CCDC136</b>                  |                                   | NM_022742    | 0.054402028        | <b>-304.744914</b>  | <b>0.022811735</b> | <b>-3.098502335</b> | 0.676337097         | <b>-12.41274252</b> |
| MBOAT1                          |                                   | NM_001080480 | 0.078818954        | <b>6.861584024</b>  | 0.114637753        | <b>-1.988414068</b> | 0.220659828         | <b>-3.63112518</b>  |
| KIF1A                           |                                   | NM_004321    | 0.3260589          | <b>147.9065022</b>  | 0.064730553        | <b>-1.911527472</b> | 0.23085106          | <b>-4.532844489</b> |
| TCF7                            |                                   | NM_003202    | 0.177260069        | <b>2.966047427</b>  | 0.056031879        | <b>1.763446763</b>  | 0.120209567         | <b>-3.750501017</b> |
| RTP1                            |                                   | NM_153708    | 0.221440729        | <b>10.26888996</b>  | 0.638291           | <b>-1.174214781</b> | 0.843468906         | <b>2.029676779</b>  |
| THTPA                           |                                   | NM_024328    | 0.509161658        | <b>-2.623437342</b> | <b>0.040872913</b> | <b>-1.797599419</b> | <b>0.004072953</b>  | <b>-8.858628356</b> |

Table S2: Signal Transduction Pathway Reporters.

| <b>Reporter</b>  | <b>Pathway</b>     | <b>Transcription Factor</b> |
|------------------|--------------------|-----------------------------|
| C/EBP Reporter   | C/EBP              | C/EBP                       |
| E2F Reporter     | Cell Cycle         | E2F/DP1                     |
| p53 Reporter     | p53/DNA Damage     | p53                         |
| GATA Reporter    | GATA               | GATA                        |
| LXR Reporter     | Liver X Receptor   | LXRa                        |
| SRE Reporter     | MAPK/ERK           | Elk-1/SRF                   |
| AP1 Reporter     | MAPK/JNK           | AP-1                        |
| NF B Reporter    | NF B               | NF B                        |
| Pax3 Reporter    | Pax3               | Pax3                        |
| Pax6 Reporter    | Pax6               | Pax6                        |
| FOXO Reporter    | PI3K/AKT           | FOXO                        |
| PPAR Reporter    | PPAR               | PPAR                        |
| SP1 Reporter     | SP1                | SP1                         |
| VDR Reporter     | Vitamin D Receptor | Vitamin D Receptor          |
| TCF/LEF Reporter | Wnt                | TCF/LEF                     |
| YY1 Reporter     | YY1                | YY1                         |



Table S3. Up-regulated genes of Klotho treated MO3.3 cells vs. CGP database

| Database                              | Description                                                                                                                                                          | Category                                       |
|---------------------------------------|----------------------------------------------------------------------------------------------------------------------------------------------------------------------|------------------------------------------------|
| UVB_NHEK3_C2                          | Regulated by UV-B light in normal human epidermal keratinocytes, cluster 2                                                                                           | Cancer; Stress                                 |
| HUMAN_TISSUE_TESTIS                   | Genes expressed specifically in human testis tissue                                                                                                                  | hormone                                        |
| BECKER_TAMOXIFEN_RESISTANT_UP         | Genes that are reproducibly up-regulated in untreated or permanently tamoxifen-treated MaCa 3366/TAM                                                                 | Cancer                                         |
| LEE_E2F1_UP                           | Genes up-regulated in hepatoma tissue of E2f1 transgenic mice                                                                                                        | Cancer                                         |
| ZHAN_MULTIPLE_MYELOMA_VS_NORMAL_DN    | 158 genes commonly dysregulated in CD-1 and CD-2 groups upregulated                                                                                                  | Cancer                                         |
| KANNAN_P53_DN                         | Target genes down regulated by p53                                                                                                                                   | Cancer                                         |
| GH_GHRHR_KO_24HRS_UP                  | Up-regulated at least 2-fold 24 hours following injection of human growth hormone (GH) into mice lacking functional GHRHR (lit/lit), and with no detectable hormone  | Cancer                                         |
| BRENTANI_IMMUNE_FUNCTION              | Cancer related genes involved in immune function                                                                                                                     | Cancer                                         |
| BRCA1_OVEREXP_UP                      | Upregulated by induction of exogenous BRCA1 in EcR-293 cells                                                                                                         | Cancer                                         |
| YAGI_AML_PROG_FAB                     | French-American-British (FAB) type-specific probe sets of acute myeloid leukemia (AML)                                                                               | Cancer                                         |
| BRCA1_OVEREXP_PROSTATE_UP             | Up-regulated with stable, ectopic overexpression of BRCA1 in DU-145 human prostate cancer cell lines, compared to neo-only controls                                  | Cancer                                         |
| GH_GHRHR_KO_24HRS_DN                  | Up-regulated at least 2-fold 6 hours following injection of human growth hormone                                                                                     | hormone                                        |
| ROSS_AML1_ETO                         | Genes that distinguish pediatric acute myeloid leukemia (AML) subtype t                                                                                              | Cancer                                         |
| VENTRICLES_UP                         | Upregulated in the ventricles of healthy hearts, compared to atria                                                                                                   | Cardiovascular                                 |
| CHIARETTI_T_ALL                       | Genes overexpressed in leukemia cells.                                                                                                                               | Cancer                                         |
| CHIARETTI_T_ALL_DIFF                  | Genes expressed in T-cell acute lymphocytic leukemia                                                                                                                 | Cancer                                         |
| SCHURINGA_STAT5A_UP                   | Differential Gene Expression in CB CD34 Cells Expressing STAT5A(1*6) Up-regulated                                                                                    | Cell proliferation differentiation and cell su |
| DIAB_NEPH_DN                          | Downregulated in the glomeruli of cadaver kidneys from patients with diabetic nephropathy, compared to normal controls                                               | Diabetes; insulin/IGF-1                        |
| MARTINELLI_IFNS_DIFF                  | Relative expression levels of neutrophil-specific genes in immature versus mature neutrophils                                                                        | immunoregulatory activities                    |
| GOLDRATH_CYTOLYTIC                    | Genes associated with cytolytic effector function induced during antigen activation of CD8+ T cells.                                                                 | immunoregulatory activities                    |
| UVB_NHEK3_ALL                         | Regulated by UV-B light in normal human epidermal keratinocytes, cluster 5                                                                                           | Cancer; Stress                                 |
| MATSUDA_VALPHAINKT_DIFF               | Differential gene expression between developmental stages of Va14i NKT cells                                                                                         | immunoregulatory activities                    |
| HSC_LATEPROGENITORS_FETAL             | Up-regulated in mouse hematopoietic late progenitors from fetal liver (Late Progenitors Shared + Fetal)                                                              | cell fate decisions                            |
| TARTE_MATURE_PC                       | Genes overexpressed in polyclonal plasmablastic cells (PPCs) as compared to mature plasma cells isolated from tonsils (TPCs) and mature plasma cell                  | immunoregulatory activities                    |
| WELCH_GATA1                           | We performed transcriptome analysis of G1E-ER4 cells a GATA-1-null erythroblast line that undergoes synchronous erythroid maturation when GATA-1 cell fate decisions | cell fate decisions; bone differentiation      |
| YANG_OSTECLASTS_SIG                   | Relative gene expression for osteoclast-associated genes, chemokines, and chemokine receptors                                                                        | cell fate decisions; bone differentiation      |
| HSC_LATEPROGENITORS_ADULT             | Up-regulated in mouse hematopoietic late progenitors from adult bone marrow (Late Progenitors Shared + Adult)                                                        | cell fate decisions; bone differentiation      |
| DAC_IFN_BLADDER_UP                    | Interferon-regulated genes upregulated by DAC (DNA methylation inhibitors 5-aza-2'-deoxycytidine (5-Aza-CdR)) treatment in T24 bladder carcinoma cells               | Cancer                                         |
| HSC_LATEPROGENITORS_SHARED            | Up-regulated in mouse hematopoietic late progenitors from both adult bone marrow and fetal liver                                                                     | cell fate decisions; bone differentiation      |
| ASTON_OLIGODENDROGLIA_MYELINATION_SUF | Genes upregulated in major depressive disorder                                                                                                                       | Depression; Myelin                             |
| VEGF_HUVEC_30MIN_UP                   | Up-regulated 30 minutes after VEGF treatment in human umbilical vein endothelial cells                                                                               | Cardiovascular                                 |
| NAKAJIMA_MCSMBP_EOS                   | Top 30 increased eosinophil specific transcripts                                                                                                                     | cell fate decisions; inflammation              |
| VEGF_HUVEC_2HRS_UP                    | Up-regulated 2 hours after VEGF treatment in human umbilical vein endothelial cells                                                                                  | Cardiovascular                                 |
| CPR_NULL-LOW_LIVER_UP                 | Up-regulated in mouse liver tissue from mice in which NADPH-cytochrome P450 reductase (CPR) was specifically deleted in the liver by cre-lox recomb                  | Stress                                         |
| RORIE_ES_PNET_DN                      | The 30 genes showing the greatest decrease in expression in NBa Ews/Fli-1 (Neuroblastoma (NB) and the Ewing sarcoma (ES)/peripheral primitive neu                    | Cancer                                         |
| HUMAN_TISSUE_PLACENTA                 | Genes expressed specifically in human placental tissue                                                                                                               | hormone                                        |
| LIAN_MYELOID_DIFF_GRANULE             | Granule constituents expressed during mouse promyelocytic cell line cell differentiation                                                                             | cell fate decisions; bone differentiation      |
| AGEING_LYMPH_DN                       | Downregulated in human lymphocytes from old individuals, compared to young                                                                                           | Stress; aging                                  |
| DAC_BLADDER_UP                        | Upregulated by DAC (DNA methylation inhibitors 5-aza-2'-deoxycytidine (5-Aza-CdR)) treatment in T24 bladder carcinoma cells                                          | Cancer                                         |
| CROONQUIST_IL6_RAS_UP                 | Genes upregulated in multiple myeloma cells exposed to the pro-proliferative cytokine IL-6 versus those with N-ras-activating mutations.                             | Cancer                                         |
| HIPPOCAMPUS_DEVELOPMENT_PRENATAL      | Highly expressed in prenatal mouse hippocampus (cluster 1)                                                                                                           | Brain development                              |
| GH_EXOGENOUS_EARLY_UP                 | Up-regulated at early time points (1-4 hours) following treatment of mammary carcinoma cells (MCF-7) with exogenous human growth hormone                             | hormone; Cancer                                |
| PENG_RAPAMYCIN_UP                     | Genes upregulated in response to rapamycin starvation, an immunosuppressive and anticancer drug                                                                      | Cancer                                         |
| DAC_PANC_UP                           | Upregulated by DAC treatment in at least one of four pancreatic cancer cell lines, but not in normal (HPDE) cells                                                    | Cancer                                         |
| ZHAN_MULTIPLE_MYELOMA_VS_NORMAL_UP    | The 70 most significantly up-regulated genes in multiple myeloma (MM) in comparison with normal bone marrow PCs                                                      | Cancer                                         |
| UVB_NHEK1_C2                          | Upregulated by UV-B light in normal human epidermal keratinocytes, cluster 2                                                                                         | Cancer; Stress                                 |
| CPR_LOW_LIVER_UP                      | Up-regulated in mouse liver tissue from mice with reduced liver expression of NADPH-cytochrome P450 reductase (CPR), versus normal controls                          | Stress                                         |
| LVAD_HEARTFAILURE_DN                  | Downregulated in the left ventricle myocardium of patients with heart failure following implantation of a left ventricular assist device                             | Cardiovascular                                 |
| TSA_CD4_DN                            | Down-regulated in mouse CD4+ T-cells following 4 hour treatment with 100 nM trichostatin A (a potent, reversible inhibitor of histone deacetylase (HDAC))            | Cancer                                         |
| HOGERKORP_CD44_DN                     | Genes up-regulated in dendritic cells (DC) stimulated for 8 and 48 h                                                                                                 | immunoregulatory activities                    |
| AGUIRRE_PANCREAS_CHR6                 | Genes on chromosome 6 with copy-number-driven expression in pancreatic adenocarcinoma.                                                                               | Cancer                                         |
| NAKAJIMA_MCS_UP                       | Most increased transcripts in activated human and mouse Mast Cells (MCs)                                                                                             | immunoregulatory activities                    |
| CREB_BRAIN_2WKS_UP                    | Up-regulated in the nucleus accumbens of mice after 2 weeks of induction of transgenic CREB (cAMP response element binding protein), transcription f                 | Brain; cAMP                                    |
| BRCA1_SW480_UP                        | Up-regulated by infection of human colon adenocarcinoma cells (SW480) with Ad-BRCA1, versus Ad-LacZ control                                                          | Cancer                                         |
| CARIES_PULP_HIGH_UP                   | Highly up-regulated (>4-fold) in pulpal tissue from extracted carious teeth (cavities), compared to tissue from extracted healthy teeth                              | hormone                                        |
| AGED_MOUSE_RETINA_ANY_UP              | Up-regulated in the retina of 16-month aged mice from any of four strains (S8, S10, SR1, B6J), versus 3-month young controls                                         | Aging                                          |
| STAEGE_EFTS_UP                        | Summary of genes up-regulated in Ewing family tumors EFTs compared with normal body atlas                                                                            | Cancer                                         |
| BLEO_MOUSE_LYMPH_LOW_24HRS_DN         | Down-regulated at 24 hours following treatment of mouse lymphocytes (TK 3.7.2C) with a low dose of bleomycin (DNA-damaging agent)                                    | Stress                                         |
| CPR_NULL_LIVER_UP                     | Up-regulated in mouse liver tissue from mice in which NADPH-cytochrome P450 reductase (CPR) was specifically deleted in the liver by cre-lox recomb                  | Stress                                         |
| FLECHNER_KIDNEY_TRANSPLANT_WELL_PBL_  | Genes downregulated in peripheral blood lymphocytes (PBLs) of immunosuppressed patients with a well functioning kidney transplant relative to PBLs of                | immunoregulatory activities                    |
| GRANDVAUX_IRF3_DN                     | Genes down-regulated by interferon regulatory factor 3 (IRF3) in Jurkat (T-cell)                                                                                     | immunoregulatory activities                    |
| TAKEDA_NUP8_HOXA9_3D_DN               | Effect of NUP98-HOXA9 on gene transcription at 3 d after transduction Down (myelodysplastic syndromes and acute myeloid leukemia)                                    | immunoregulatory activities; Cancer            |
| CPR_NULL_LIVER_DN                     | Down-regulated in mouse liver tissue from mice in which NADPH-cytochrome P450 reductase (CPR) was specifically deleted in the liver by cre-lox reco                  | Stress                                         |
| YU_CMYC_DN                            | Myc-repressed genes in neoplastic transformation                                                                                                                     | Cancer                                         |
| CROONQUIST_RAS_STROMA_UP              | Genes upregulated in multiple myeloma cells with N-ras-activating mutations versus those co-cultured with bone marrow stromal cells.                                 | Cancer                                         |
| TF2_KO_UP                             | Up-regulated in pyloric atrium tissue from gastrointestinal trefoil factor family Trefoil Factor 2 (Tf2) knockout mice, compared to wild-type controls               | immunoregulatory activities                    |
| TNFALPHA_TGZ_ADIP_DN                  | Downregulated in mature, differentiated adipocytes following treatment with TNFalpha (anti-Diabetes)                                                                 | Diabetes                                       |
| HYPERME_COLONCA_SW48                  | Gene identified by chromatin IP and CpG island microarray as being hypermethylated in SW48 colon cancer cells, versus normal colon mucosa or WI3                     | Cancer                                         |
| CMV_HCMV_TIMECOURSE_16HRS_DN          | Down-regulated in fibroblasts following infection with human cytomegalovirus                                                                                         | Stress; immunoregulatory activities            |
| UV_UNIQUE_FIBRO_UP                    | Up-regulated at any timepoint by treatment of human fibroblasts with UV light, but not by gamma radiation or 4-NQO                                                   | Stress                                         |
| XPB_TTD-CS_DN                         | Down-regulated in XPB/TTD fibroblasts (expressing XPB-A355C), compared to XPB/CS fibroblasts (expressing XPB-T296C)                                                  | DNA repair; skin cancer                        |
| UV_UNIQUE_FIBRO_DN                    | Down-regulated at any timepoint by treatment of human fibroblasts with UV light, but not by gamma radiation or 4-NQO                                                 | Cancer; Stress                                 |
| TSADAC_RKOSILENT_UP                   | Genes basally silent, with hypermethylated promoters, upregulated by the combination of TSA and DAC in RKO cells                                                     | Cancer                                         |
| CHESLER_BRAIN_NEURAL_HIGH_GENES       | Genes with high expression of transcripts in brain and other neural tissues (from the GNF Expression Atlas)                                                          | Brain development                              |
| HADDAD_CD45CD7_PLUS_VS_MINUS_UP       | Genes enriched in CD45RAhiCD7hi vs CD45RAintCD7- HPCs                                                                                                                | immunoregulatory activities                    |
| TSADAC_PANC50_UP                      | 50 most interesting genes upregulated by the combination of TSA and DAC in at least one of four pancreatic cancer cell lines, but not in normal (HPDE) cells         | Cancer                                         |
| UVC_HIGH_ALL_UP                       | Up-regulated at any timepoint following treatment of WS1 human skin fibroblasts with UVC at a high dose (50 J/m^2) (clusters b1-b4)                                  | DNA repair; Stress                             |
| HOUSTIS_ROS                           | Genes known to modulate ROS or whose expression changes in response to ROS                                                                                           | Stress                                         |
| ZHAN_MULTIPLE_MYELOMA_SUBCLASSES_DIFF | The 30 most differentially expressed genes in a comparison of MM1 and MM4 subgroups (multiple Myeloma)                                                               | Cancer; Bone differentiation                   |
| WANG_HOXA9_VS_MEIS1_DN                | Genomic signature of progenitors immortalized by Hoxa9 versus Hoxa9 plus Meis1 Increased expression in Hoxa9 plus Meis1-immortalized progenitors                     | Cancer                                         |
| MARSHALL_SPLEEN_BAL                   | Genes downregulated in influenza-specific CD8+ T cells isolated from spleen as compared to those from bronchoalveolar lavage (BAL) during influenza                  | immunoregulatory activities                    |
| HANSON_NFKAPPB_IND                    | Ras-inducible, NF-kB-regulated genes                                                                                                                                 | Cancer                                         |
| TSA_CD4_UP                            | Up-regulated in mouse CD4+ T-cells following 4 hour treatment with 100 nM trichostatin A (a potent, reversible inhibitor of histone deacetylase (HDAC))              | Cancer                                         |
| FERRANDO_T_CELL_DIFFERENTIATION_PATHW | Genes involved with T cell differentiation which are upregulated in samples positive for HOX11, TAL1, or LYL1 by RT-PCR                                              | immunoregulatory activities                    |
| IFNALPHA_NL_UP                        | Upregulated by interferon alpha treatment in normal primary hepatocytes                                                                                              | immunoregulatory activities                    |
| HADDAD_HSC_CD7_UP                     | Genes upregulated in human hematopoietic stem cells of the line CD45RA(hi) CD7+, which are biased toward developing into T lymphocytes or natural                    | immunoregulatory activities                    |
| GAMMA_UNIQUE_FIBRO_DN                 | Down-regulated at any timepoint by treatment of human fibroblasts with gamma radiation, but not by UV light or 4-NQO                                                 | Stress; DNA repair                             |
| LIZUKA_G2_GR_G3                       | Genes highly expressed in moderately differentiated vs. poorly differentiated hepatocellular carcinoma                                                               | Cancer                                         |
| RESISTANCE_XENOGRAPTS_UP              | Up-regulation is correlated with resistance of human cancer xenografts to at least six of seven anticancer drugs tested                                              | Cancer                                         |
| YAGI_AML_PROGNOSIS                    | French-American-British (FAB) type-specific probe sets of acute myeloid leukemia (AML)                                                                               | Cancer                                         |
| PARP_KO_UP                            | Downregulated in MEF cells from PARP knockout mice; PARP deficiency also up-regulates genes that encode extracellular matrix or cytoskeletal protei                  | Cancer; Aging                                  |
| LEE_ACOX1_UP                          | Genes up-regulated in hepatoma tissue in Acox1 KO mice                                                                                                               | Cancer                                         |
| IFNALPHA_NL_HCC_UP                    | Upregulated by interferon alpha treatment in both normal primary hepatocytes and Hep3B hepatocellular carcinoma cells                                                | Cancer                                         |
| DAC_PANC50_UP                         | 50 most interesting genes upregulated by DAC treatment in at least one of four pancreatic cancer cell lines, but not in normal (HPDE) cells                          | Cancer                                         |
| BRG1_ALAB_DN                          | Down-regulated at 18 and 24 hours following adenovirus-mediated expression of BRG1 in ALAB breast cancer cells with mutant, inactive BRG1                            | Cancer                                         |
| LEE_MYC_TGFA_UP                       | Genes up-regulated in hepatoma tissue of Myc+Tgfa transgenic mice                                                                                                    | Cancer                                         |
| HOHENKIRK_MONOCYTE_DEND_DN            | Down-regulated mRNAs in monocyte-derived DCs                                                                                                                         | cell fate decisions; immunoregulatory acti     |
| HUMAN_TISSUE_THYMUS                   | Genes expressed specifically in human thymus tissue                                                                                                                  | cell fate decisions                            |
| TPA_RESIST_MIDDLE_UP                  | Upregulated by TPA at two consecutive timepoints between 2-24hrs in resistant HL-525 cells. The tumor promoter 12-O-tetradecanoylphorbol-13-acetat                   | Cancer                                         |
| MMS_MOUSE_LYMPH_HIGH_4HRS_UP          | Up-regulated at 4 hours following treatment of mouse lymphocytes (TK 3.7.2C) with a high dose of methyl methanesulfonate (MMS) (DNA damage agent)                    | DNA repair; Stress                             |

Table S4. Down-regulated genes of Klotho treated MO3.3 cells vs. CGP database

| Database                               | Description                                                                                                                                                                                            | Category                     |
|----------------------------------------|--------------------------------------------------------------------------------------------------------------------------------------------------------------------------------------------------------|------------------------------|
| HEARTFAILURE_ATRIA_DN                  | Downregulated in the atria of failing hearts (DCM and ICM) compared to healthy controls                                                                                                                | Cardiovascular               |
| IFN_BETA_GLIOMA_UP                     | Up-regulated in human glioma cells (T98) at 48 hours following treatment with interferon-beta                                                                                                          | Cancer                       |
| HEARTFAILURE_VENTRICLE_DN              | Downregulated in the ventricles of failing hearts (DCM and ICM) compared to healthy controls                                                                                                           | Cardiovascular               |
| GUO_HEX_DN                             | Down-regulated genes in day-6 Hex/ embryoid bodies                                                                                                                                                     | Cell fate decisions          |
| JECHLINGER_EMT_UP                      | Genes upregulated for epithelial plasticity in tumor progression                                                                                                                                       | Cancer                       |
| NING_COPD_DN                           | Downregulated genes in lung tissue of smokers with chronic obstructive pulmonary disease (COPD) vs smokers without disease (GOLD-2 vs GOLD-0)                                                          | Stress                       |
| ET743_SARCOMA_UP                       | Up-regulated following treatment with Et-743 at any timepoint in at least 8 of 11 sarcoma cell line                                                                                                    | Cancer                       |
| EMT_UP                                 | Up-regulated during the TGFbeta-induced epithelial-to-mesenchymal transition (EMT) of Ras-transformed mouse mammary epithelial (EpH4) cells (EMT is representative of late-stage tumor progression)    | Cancer                       |
| ET743_SARCOMA_72HRS_UP                 | Up-regulated at 48 hours following treatment with Et-743 in at least 6 of 8 sarcoma cell lines                                                                                                         | Cancer                       |
| RADAEVA_IFNA_UP                        | Upregulated by interferon alpha treatment in Hep3B hepatocellular carcinoma cells                                                                                                                      | Cancer                       |
| ZUCCHI_EPITHELIAL_UP                   | The 50 most upregulated genes in primary invasive breast ductal carcinoma or metastatic breast carcinoma isolated from lymph nodes, as compared to normal mammary epithelium.                          | Cancer                       |
| ELONGINA_KO_DN                         | Downregulated in MES cells from elongin-A knockout mice                                                                                                                                                | Cell fate decisions          |
| IDX_TSA_DN_CLUSTER1                    | Down-regulated at 48-96 hours during differentiation of 3T3-L1 fibroblasts into adipocytes with IDX (insulin, dexamethasone and isobutylxanthine), vs. fibroblasts treated with IDX + TSA              | Cancer                       |
| TSA_HEPATOMA_UP                        | Up-regulated in more than one of several human hepatoma cell lines by 24-hour treatment with trichostatin A                                                                                            | Cancer                       |
| REOVIRUS_HEK293_UP                     | Up-regulated at any timepoint up to 24 hours following infection of HEK293 cells with reovirus strain T3Abney                                                                                          | Stress; Viral infection      |
| IFNALPHA_HCC_UP                        | Upregulated by interferon alpha treatment in Hep3B hepatocellular carcinoma cells                                                                                                                      | Cancer                       |
| BENNETT_SLE_UP                         | Genes Significantly up-regulated in SLE patient Blood Mononuclear Cells                                                                                                                                | Immunoregulatory activities  |
| ET743_SARCOMA_6HRS_UP                  | Up-regulated at 6 hours following treatment with Et-743 in at least 8 of 11 sarcoma cell lines                                                                                                         | Cancer                       |
| RIBAVIRIN_RSV_UP                       | Up-regulation by infection of human pulmonary epithelial cells (A549) with respiratory syncytial virus (RSV) is enhanced by the anti-viral drug ribavirin                                              | Stress; Viral infection      |
| DNMT1_KO_UP                            | Upregulated following conditional knock-out of DNMT1 in MEFs                                                                                                                                           | Cell fate decisions          |
| REOVIRUS_HEK293_DN                     | Down-regulated at any timepoint up to 24 hours following infection of HEK293 cells with reovirus strain T3Abney                                                                                        | Stress; Viral infection      |
| HDACI_COLON_TSA48HRS_UP                | Upregulated by TSA at 48 hrs in SW260 colon carcinoma cells                                                                                                                                            | Cancer                       |
| AGUIRRE_PANCREAS_CHR9                  | Genes on chromosome 9 with copy-number-driven expression in pancreatic adenocarcinoma.                                                                                                                 | Cancer                       |
| FALT_BCLL_UP                           | Genes up-regulated in VH3-21+ B-CLL                                                                                                                                                                    | Immunoregulatory activities  |
| CMV_ALL_DN                             | Downregulated at any timepoint following infection of primary human foreskin fibroblasts with CMV                                                                                                      | Stress; Viral infection      |
| AGUIRRE_PANCREAS_CHR17                 | Genes on chromosome 17 with copy-number-driven expression in pancreatic adenocarcinoma.                                                                                                                | Cancer                       |
| CMV_24HRS_DN                           | Down-regulated in fibroblasts following infection with human cytomegalovirus                                                                                                                           | Stress; Viral infection      |
| NF90_DN                                | Downregulated by ectopic expression of NF90 in GHOST(3)CXCR4 cells                                                                                                                                     | Stress; Viral infection      |
| VHL_RCC_UP                             | Upregulated in VHL-null renal carcinoma cells vs. VHL-rescued (Fig. 1a+b)                                                                                                                              | Cancer                       |
| HDACI_COLON_CLUSTER10                  | Regulated by TSA, butyrate and/or curcumin in SW260 colon carcinoma cells                                                                                                                              | Cancer                       |
| TGFBETA_LATE_UP                        | Upregulated by TGF-beta treatment of skin fibroblasts                                                                                                                                                  | Cancer                       |
| NOUZOVA_CPG_H4_UP                      | CpG islands with greatly increased H4 acetylation in ATRA-treated NB4 cells                                                                                                                            | Cancer                       |
| SRC_ONCOGENIC_SIGNATURE                | Genes selected in supervised analyses to discriminate cells expressing activated H-Ras oncogene from control cells expressing GFP.                                                                     | Cancer                       |
| HEARTFAILURE_ATRIA_UP                  | Upregulated in atria of failing hearts (DCM and ICM) compared to healthy controls                                                                                                                      | Cardiovascular               |
| HDACI_COLON_TSBUT_UP                   | Upregulated by both butyrate and TSA at any timepoint up to 48 hrs in SW260 colon carcinoma cells                                                                                                      | Cancer                       |
| ROTH_HTERT_DIFF                        | Expression of selected genes involved in DNA repair and cell-cycle control in hTERT-transduced T cells                                                                                                 | Stress; Cell fate decisions  |
| MANALO_HYPOXIA_DN                      | Genes downregulated in human pulmonary endothelial cells under hypoxic conditions or after exposure to AdCA5, an adenovirus carrying constitutively active hypoxia-inducible factor 1                  | Cardiovascular               |
| FSH_OVARY_MCV152_DN                    | Down-regulated in ovarian epithelial cells (MCV152) 72 hours following FSH treatment, compared to untreated                                                                                            | hormone                      |
| HDACI_COLON_TSA_UP                     | Upregulated by TSA at any timepoint up to 48 hrs in SW260 colon carcinoma cells                                                                                                                        | Cancer                       |
| BRCA2_BRCA1_UP                         | Genes up-regulated in BRCA2-linked breast tumors, relative to BRCA1-linked tumors                                                                                                                      | Cancer                       |
| LI_FETAL_VS_WT_KIDNEY_DN               | These are genes identified by simple statistical criteria as differing in their mRNA expression between WTs and fetal kidneys HIGH                                                                     | Cell fate decisions          |
| GH_GHRHR_KO_6HRS_DN                    | Down-regulated at least 2-fold 6 hours following injection of human growth hormone                                                                                                                     | hormone                      |
| HDACI_COLON_BUT30MIN_DN                | Downregulated by butyrate at 30 min in SW260 colon carcinoma cells                                                                                                                                     | Cancer                       |
| TGFBETA_C5_UP                          | Upregulated by TGF-beta treatment of skin fibroblasts, cluster 5                                                                                                                                       | Cancer                       |
| UVC_TTD-XPCS_COMMON_DN                 | Down-regulated at any timepoint following treatment of both XPB/CS and XPB/TTD fibroblasts with 3 J/m <sup>2</sup> UVC                                                                                 | Stress                       |
| JNK_UP                                 | Upregulated by expression of constitutively active JNK in 3T3 cells                                                                                                                                    | Cancer                       |
| H2O2_CSBRESCUED_C1_UP                  | Upregulated by H2O2 in CSB-rescued fibroblasts (Table 1, cluster 1)                                                                                                                                    | Stress                       |
| BRENTANI_REPAIR                        | Cancer related genes involved in DNA repair                                                                                                                                                            | Cancer; DNA repair           |
| UVB_NHEK1_DN                           | Downregulated by UV-B light in normal human epidermal keratinocytes                                                                                                                                    | Stress                       |
| BRENTANI_PROTEIN_MODIFICATION          | Cancer related genes involved in protein modification                                                                                                                                                  | Cancer                       |
| P53_BRCA1_UP                           | Upregulated by expression of p53 in p53-null, brca1-null MEFs; most genes are further upregulated by simultaneous expression of BRCA1                                                                  | Cancer                       |
| AGUIRRE_PANCREAS_CHR19                 | Genes on chromosome 19 with copy-number-driven expression in pancreatic adenocarcinoma.                                                                                                                | Cancer                       |
| TGFBETA_ALL_UP                         | Upregulated by TGF-beta treatment of skin fibroblasts                                                                                                                                                  | Cancer                       |
| UVB_NHEK2_DN                           | Downregulated by UV-B light in normal human epidermal keratinocytes                                                                                                                                    | Stress                       |
| AGUIRRE_PANCREAS_CHR8                  | Genes on chromosome 8 with copy-number-driven expression in pancreatic adenocarcinoma.                                                                                                                 | Cancer                       |
| CROMER_HYPOPHARYNGEAL_MET_VS_NON_UP    | Genes increased in metastatic hypopharyngeal cancer tumours                                                                                                                                            | Cancer                       |
| ET743_RESIST_DN                        | Down-regulated in two Et-743-resistant cell lines                                                                                                                                                      | Cancer                       |
| CTNNB1_ONCOGENIC_SIGNATURE             | Genes selected in supervised analyses to discriminate cells expressing activated beta-catenin (CTNNB1) oncogene from control cells expressing GFP.                                                     | Cancer                       |
| CORTEX_ENRICHMENT_LATE_UP              | Up-regulated in the cortex of mice that are exposed to an enriched environmental habitat for 2 or 14 days                                                                                              | Brain                        |
| MAGRANGEAS_MULTIPLE_MYELOMA_IGL_VS_IGK | Genes downregulated in multiple myeloma plasma cells that secrete the light chain immunoglobulin Igi-lambda versus those that secrete Igi-kappa.                                                       | Cancer                       |
| BRCA1_OVEXEXP_DN                       | Downregulated by induction of exogenous BRCA1 in EcR-293 cells                                                                                                                                         | Cancer                       |
| CROONQUIST_RAS_STROMA_DN               | Genes upregulated in multiple myeloma cells with N-ras-activating mutations.                                                                                                                           | Cancer                       |
| NAB_LUNG_DN                            | Down-regulated in human non-small cell lung carcinoma cell line H460 following 24-hour treatment with sodium butyrate                                                                                  | Cancer                       |
| CMV_8HRS_DN                            | Downregulated at 8hrs following infection of primary human foreskin fibroblasts with CMV                                                                                                               | Stress; Viral infection      |
| CHANG_SERUM_RESPONSE_UP                | CSR (Serum Response) signature for activated genes (Stanford)                                                                                                                                          | Immunoregulatory activities  |
| CMV_HCMV_TIMECOURSE_20HRS_UP           | Up-regulated in fibroblasts following infection with human cytomegalovirus                                                                                                                             | Stress; Viral infection      |
| H2O2_CSBDIFF_C2                        | Deficient induction by H2O2 in CSB-null fibroblasts, compared to CSB-rescued                                                                                                                           | Stress                       |
| GH_EXOGENOUS_ALL_UP                    | Up-regulated consistently at all time points (1-24 hours) following treatment of mammary carcinoma cells (MCF-7) with exogenous human growth hormone                                                   | Cancer                       |
| WERNERONLY_FIBRO_DN                    | Downregulated in fibroblasts from Werner (but not old) individuals, compared to young                                                                                                                  | Aging                        |
| CROONQUIST_IL6_STROMA_UP               | Genes upregulated in multiple myeloma cells exposed to the pro-proliferative cytokine IL-6 versus those with N-ras-activating mutations.                                                               | Cancer                       |
| HDACI_COLON_TSA2HRS_UP                 | Upregulated by TSA at 2 hrs in SW260 colon carcinoma cells                                                                                                                                             | Cancer                       |
| GOLUB_ALL_VS_AML_UP                    | Genes highly correlated with acute lymphoblastic leukemia (correlation P(g,c) > 0.30)                                                                                                                  | Cancer                       |
| OXSTRESS_RPE_HNETBH_DN                 | Downregulated by HNE and t-BH in retinal pigment epithelium cells (Tables 3)                                                                                                                           | Stress                       |
| HDACI_COLON_CLUSTER9                   | Regulated by TSA, butyrate and/or curcumin in SW260 colon carcinoma cells                                                                                                                              | Cancer                       |
| SMITH_HCV_INDUCED_HCC_UP               | Genes highly expressed in hepatitis C-related hepatocellular carcinoma                                                                                                                                 | Cancer                       |
| YE_INTRAMETASTATIC_HCC_UP              | Genes highly expressed in hepatocellular carcinoma with intra-hepatic metastasis.                                                                                                                      | Cancer                       |
| HDACI_COLON_TSA12HRS_UP                | Upregulated by TSA at 12 hrs in SW260 colon carcinoma cells                                                                                                                                            | Cancer                       |
| NADLER_OBESITY_UP                      | Genes with increased expression with obesity                                                                                                                                                           | Cell fate decisions; Obesity |
| ET743_HELA_DN                          | Downregulated by Et-743 in HeLa cells                                                                                                                                                                  | Cancer                       |
| HBX_HCC_DN                             | Downregulated by expression of Hepatitis B virus HBx protein in SK-Hep-1 hepatocellular carcinoma cells                                                                                                | Cancer                       |
| DORSAM_HOXA9_DN                        | Genes upregulated by HOXA9                                                                                                                                                                             | Cancer                       |
| LIAN_MYELOID_DIFF_RECEPTORS            | Transcription modulators presented during myeloid differentiation                                                                                                                                      | Cell fate decisions          |
| HUMAN_TISSUE_LIVER                     | Genes expressed specifically in human liver tissue                                                                                                                                                     | Cell fate decisions          |
| IDX_TSA_UP_CLUSTER2                    | Strongly up-regulated at 8 hours during differentiation of 3T3-L1 fibroblasts into adipocytes with IDX (insulin, dexamethasone and isobutylxanthine), vs. fibroblasts treated with IDX + TSA           | Cell fate decisions          |
| HASLINGER_B_CLL_13Q14                  | Top 25 Genes Differentially Expressed in the Respective B-Cell Lymphocytic Leukemia                                                                                                                    | Cancer                       |
| MYOD_NIH3T3_UP                         | Up-regulated at 24 hours in NIH 3T3 murine fibroblasts following transduction with MyoD and incubation in differentiation medium                                                                       | Cell fate decisions          |
| MYOD_BRG1_UP                           | Genes up-regulated following transduction of MyoD in NIH 3T3 cells that fail to achieve full induction with expression of a dominant-negative BRG1 allele; induction thought to require full induction | Cell fate decisions          |
| HDACI_COLON_BUT24HRS_DN                | Downregulated by butyrate at 24 hrs in SW260 colon carcinoma cells                                                                                                                                     | Cancer                       |
| IGF_VS_PDGF_UP                         | Up-regulated in mouse C2AS12 myoblasts by treatment with IGF1, compared to treatment with PDGF                                                                                                         | Cancer                       |
| SERUM_FIBROBLAST_CORE_UP               | Core group of genes consistently up-regulated following exposure to serum in a variety of human fibroblast cell lines                                                                                  | Cell fate decisions          |
| UVC_XPCS_8HR_DN                        | Down-regulated at 8 hours following treatment of XPB/CS fibroblasts with 3 J/m <sup>2</sup> UVC                                                                                                        | Stress                       |
| PENG_GLUTAMINE_UP                      | Genes upregulated in response to glutamine starvation                                                                                                                                                  | Stress                       |
| ADIP_VS_FIBRO_UP                       | Upregulated following 7-day differentiation of murine 3T3-L1 fibroblasts into adipocytes                                                                                                               | Cell fate decisions          |
| UVC_XPCS_4HR_DN                        | Down-regulated at 4 hours following treatment of XPB/CS fibroblasts with 3 J/m <sup>2</sup> UVC                                                                                                        | Stress                       |
| WALLACE_JAK2_DIFF                      | JAK2-dependent genes with a 7-fold change in both experiments 1 and 2                                                                                                                                  | Cell fate decisions          |
| UV-CMV_UNIQUE_HCMV_6HRS_DN             | Down-regulated in fibroblasts at 6 hours following infection with UV-inactivated CMV, but not untreated CMV                                                                                            | Stress; Viral infection      |
| VANASSE_BCL2_TARGETS                   | Differential Gene Expression Analysis of Murine CD19+ B Cells Overexpressing Bcl-2                                                                                                                     | Cancer                       |
| ET743PT650_COLONCA_DN                  | Downregulated by both Et-743 and Pt-650 in HCT116 cells                                                                                                                                                | Cancer                       |
| MOREAUX_TACI_HI_IN_PPC_UP              | PPC genes overexpressed in TACI low patients. B-cell activating factor (BAFF) and a proliferation-inducing ligand (APRIL) have been shown to promote multiple myeloma (MM) cell growth                 | Cancer                       |
| GAY_YY1_DN                             | List of YY1 target genes identified in MEFs expressing ~25% of YY1 Down                                                                                                                                | Cell fate decisions          |
